# Supplementary material for: Physician perceptions of pharmacist roles in a primary care setting in Qatar
Source: PubMed Central journal article supplement (PMC3475112; doi:10.1186/1744-8603-8-12), 2012-05-31
Supplement: 1744-8603-8-12-S1.pdf [file 1744-8603-8-12-S1.pdf]

## APPENDIX – PHYSICIAN QUESTIONNAIRE

1. Please indicate your gender:  Male  Female
2. Please select the age group to which you belong:  < 30  30-40  40-50  50-60  >60
3. Please indicate your nationality: \_\_\_\_\_
4. Please select the Highest Family Medicine Qualification obtained:  Board certification  Masters  Postgraduate diploma
5. Please indicate the country where highest medical qualification obtained: \_\_\_\_\_
6. Please select the year group in which you obtained your highest medical qualification:  
Year of  2000-2009  1990-1999  1980-1989  1970-1979  <1970
7. Please indicate the number of years you have been working in primary health care:  < 5  5-10  11-15  > 15
8. Please indicate the number of years you have been working at QP Medical Services:  < 5  5-10  11-15  > 15
9. Please estimate the annual average of approved CPD / CME hours you have participated in over the past 5 years: \_\_\_\_\_
10. In an average month, please estimate the frequency of your interactions with a pharmacist:  
 EVERY DAY  MORE THAN ONCE/WEEK  ONCE A WEEK  
 MORE THAN ONCE/MONTH  ONCE A MONTH  LESS THAN ONCE/MONTH

11. Please rank the following according to the most frequent type of interaction you initiate with a pharmacist:

(Start at **1** for **most frequent** and finish with 5 or 6 for least frequent)

- Questions about drug availability at QP
- Questions about drug alternatives available at QP
- Questions about drug dosages
- Questions about medication side effects
- Questions about drug interactions
- Other: \_\_\_\_\_

12. Please rank the following according to the most frequent type of interaction a pharmacist initiates with you:

(Start at **1** for **most frequent** and finish with 5 or 6 for least frequent)

- Clarifying a prescription order (drug dosing or drug choice)
- Requesting a prescription change due to patient medication allergy
- Requesting a prescription change due to unavailability of medication at QP
- Discussions about patient non-adherence to drug therapy
- Requests for more patient history
- Other: \_\_\_\_\_

13. Please rate your **comfort with pharmacist roles** described below.

Select the number which best applies to your level of comfort.

| PHARMACIST ROLES                                                                                                              | COMPLETELY COMFORTABLE | SOMEWHAT COMFORTABLE | UNCOMFORTABLE |
|-------------------------------------------------------------------------------------------------------------------------------|------------------------|----------------------|---------------|
| Providing medication-related patient education                                                                                | 1                      | 2                    | 3             |
| Providing disease-related patient education                                                                                   | 1                      | 2                    | 3             |
| Suggesting use of non-prescription medication ("over-the counter" (OTC)) to patients<br>( <i>e.g. paracetamol, antacids</i> ) | 1                      | 2                    | 3             |
| Suggesting use of prescription medications to patients<br>( <i>e.g. antibiotics, cardiovascular therapy</i> )                 | 1                      | 2                    | 3             |
| Suggesting patient use of prescription medication to the physician                                                            | 1                      | 2                    | 3             |
| Treating minor illnesses ( <i>e.g. headache, dyspepsia</i> )                                                                  | 1                      | 2                    | 3             |
| Detecting and preventing prescription errors                                                                                  | 1                      | 2                    | 3             |
| Designing drug therapy regimens<br>(drug selection, dose, interval, length of therapy)                                        | 1                      | 2                    | 3             |
| Monitoring safety of drug therapy regimens<br>( <i>i.e. side effect assessment</i> )                                          | 1                      | 2                    | 3             |
| Monitoring outcomes of drug therapy regimens and plans<br>( <i>i.e. has patient achieved desired blood pressure</i> )         | 1                      | 2                    | 3             |
| Recommending changes to drug therapy regimens to physicians when outcomes are not achieved                                    | 1                      | 2                    | 3             |

14. The following is a list of statements pertaining to your **expectations of pharmacist roles**.

Please select your level of agreement with these statements.

| PHARMACIST ROLES                                                                                                                        | STRONGLY AGREE | AGREE | NEITHER AGREE OR DISAGREE | DISAGREE | STRONGLY DISAGREE |
|-----------------------------------------------------------------------------------------------------------------------------------------|----------------|-------|---------------------------|----------|-------------------|
| I expect pharmacists to take personal responsibility for resolving any drug-related problems they discover involving my patients        | 1              | 2     | 3                         | 4        | 5                 |
| I expect pharmacists to be knowledgeable drug therapy experts                                                                           | 1              | 2     | 3                         | 4        | 5                 |
| I expect pharmacists to assist me in designing drug therapy treatment plans for my patients                                             | 1              | 2     | 3                         | 4        | 5                 |
| I expect pharmacists to educate my patient about the safe and appropriate use of their medication                                       | 1              | 2     | 3                         | 4        | 5                 |
| I expect pharmacists to monitor my patients' response to drug therapy and let me know if a patient encounters any drug-related problems | 1              | 2     | 3                         | 4        | 5                 |
| I expect pharmacists to assist my patients in selecting the appropriate non-prescription ("OTC") medications                            | 1              | 2     | 3                         | 4        | 5                 |
| I expect pharmacists to know the specific indication for each drug I prescribe                                                          | 1              | 2     | 3                         | 4        | 5                 |
| I expect pharmacists to be available to me for consultation when I see patients<br><i>(e.g. during a clinic visit or appointment)</i>   | 1              | 2     | 3                         | 4        | 5                 |
| I expect the pharmacists to take reasonable steps to ensure that my patients have their medications refilled on time                    | 1              | 2     | 3                         | 4        | 5                 |
| I expect the pharmacist to recommend changes to drug therapy regimens to the physician when outcomes are not achieved for patients      | 1              | 2     | 3                         | 4        | 5                 |

15. The following is a list of statements pertaining to your **experience with pharmacists**.  
Please select your level of agreement with these statements.

|                                                                                                                                                                     | <b>STRONGLY AGREE</b> | <b>AGREE</b> | <b>NEITHER AGREE OR DISAGREE</b> | <b>DISAGREE</b> | <b>STRONGLY DISAGREE</b> |
|---------------------------------------------------------------------------------------------------------------------------------------------------------------------|-----------------------|--------------|----------------------------------|-----------------|--------------------------|
| In my experience, pharmacists are reliable source of general drug information (i.e. facts about drug which can be found in standard references)                     | 1                     | 2            | 3                                | 4               | 5                        |
| In my experience, pharmacists are reliable source of clinical drug information (i.e. information regarding the clinical use of drug in specific patient situations) | 1                     | 2            | 3                                | 4               | 5                        |
| In my experience, pharmacists routinely counsel my patients regarding the safe and appropriate use of their medications                                             | 1                     | 2            | 3                                | 4               | 5                        |
| In my experience, when pharmacists discover problems with my prescription, they privately inform me                                                                 | 1                     | 2            | 3                                | 4               | 5                        |
| In my experience, pharmacists routinely inform me about more cost-effective alternatives to the drugs I prescribe                                                   | 1                     | 2            | 3                                | 4               | 5                        |
| In my experience, pharmacists frequently ask me to clarify for them the drug therapy objectives or desired outcomes I have in mind for my patients                  | 1                     | 2            | 3                                | 4               | 5                        |
| In my experience, pharmacists frequently let me know that my patients have experienced some problems with their medication                                          | 1                     | 2            | 3                                | 4               | 5                        |
| In my experience, pharmacists appear willing to take responsibility for finding solutions to any drug-related problems they discover                                | 1                     | 2            | 3                                | 4               | 5                        |
| I have a relationship with one or more pharmacists wherein I collaborate with them to determine and adjust my patient's drug therapy regimen                        | 1                     | 2            | 3                                | 4               | 5                        |

16. The following is a list of statements describing some negative experiences with pharmacists.  
Please describe whether you have ever encountered such a behaviour.

| Experience                                                                                                                                            | Yes | No |
|-------------------------------------------------------------------------------------------------------------------------------------------------------|-----|----|
| The pharmacist reportedly tried to be helpful by educating the patient, but actually scared patient and the patient no longer wished to take the drug |     |    |
| The pharmacist gave the patient the wrong drug or wrong dosage                                                                                        |     |    |
| The pharmacist reportedly made inappropriate comments about a prescribed medication in the presence of a patient                                      |     |    |
| The pharmacist reportedly made inappropriate comments about a prescriber in presence of a patient                                                     |     |    |
| The pharmacist refilled prescription not indicated for refill                                                                                         |     |    |
| The pharmacist refused to order a medication not in the formulary                                                                                     |     |    |
| The pharmacist changed the original directions on a prescription refill (prescriber's order) inappropriately                                          |     |    |

17. Please describe the most common barrier(s) or obstacle(s) for multidiscipline (interprofessional) collaboration among pharmacists and physicians:

18. The following is a list of statements pertaining to your **collaboration with pharmacist**.

Please select your level of agreement with these statements.

|                                                                                                                                 | <b>STRONGLY AGREE</b> | <b>AGREE</b> | <b>NEITHER AGREE OR DISAGREE</b> | <b>DISAGREE</b> | <b>STRONGLY DISAGREE</b> |
|---------------------------------------------------------------------------------------------------------------------------------|-----------------------|--------------|----------------------------------|-----------------|--------------------------|
| I believe interprofessional collaboration may involve a risk to my profession and image as a physician                          | 1                     | 2            | 3                                | 4               | 5                        |
| I am willing to accept the changes and perceived risks involved in developing collaborations with pharmacists                   | 1                     | 2            | 3                                | 4               | 5                        |
| I think expanding pharmacist roles in patient care will prevent me from providing the best care to my patients as the physician | 1                     | 2            | 3                                | 4               | 5                        |
| Physician familiarity with pharmacist abilities could lend support to a physician's willingness to accept a pharmacist's input. | 1                     | 2            | 3                                | 4               | 5                        |
| Physician respect for pharmacist abilities could lend support to a physician's willingness to accept a pharmacist's input.      | 1                     | 2            | 3                                | 4               | 5                        |

19. Please indicate any comments/ideas/improvements needed for pharmacist roles in patient-centered care:

20. You have reached the end of the survey. Thank you for your time.
